# Supplementary material for: The association of treatment response and joint damage with ACPA-status in recent-onset RA: a subanalysis of the 8-year follow-up of the BeSt study
Source: HighWire-hosted journal article supplement (doi:10.1136/annrheumdis-2011-200379), 2011-11-23
Supplement: annrheumdis-2011-200379_ds1.pdf [file annrheumdis-2011-200379_ds1.pdf]

## UNDERSTANDING COVID-19 RECOVERY, PHYSICAL ACTIVITY AND WELLBEING

### Interview Guide

#### Recovery experience

Can you start by telling me about your COVID-19 experience? What happened, and how have you been recovering since?

What support have you had to recover?

- Probe re: support from different groups inc. employer, GP, hospital, friends/family, other survivors
- Role of social media/govt information (see if participant raises unprompted)
- What support has been missing so far or do you think you might need in the future?

#### Role of physical activity

How has physical activity and exercise played a part in your COVID-19 experience?

- For example, how have your physical activity levels been affected?
- Has physical activity been an issue (positive or negative) in your recovery so far?

#### Future outlook

What are your priorities (and/or concerns) for your health and wellbeing going forward?

#### Positive experiences

What have been the positives from your experience?

#### Other

Is there anything else we haven't covered that you think is important to mention here?
